# Supplementary material for: Coexisting Nodular Sclerosis Hodgkin Lymphoma and Kimura’s Disease: A Case Report and Literature Review
Source: MDPI journal article supplement (doi:10.3390/ijms24087666), 2023-04-21
Supplement: s1 [file s1]

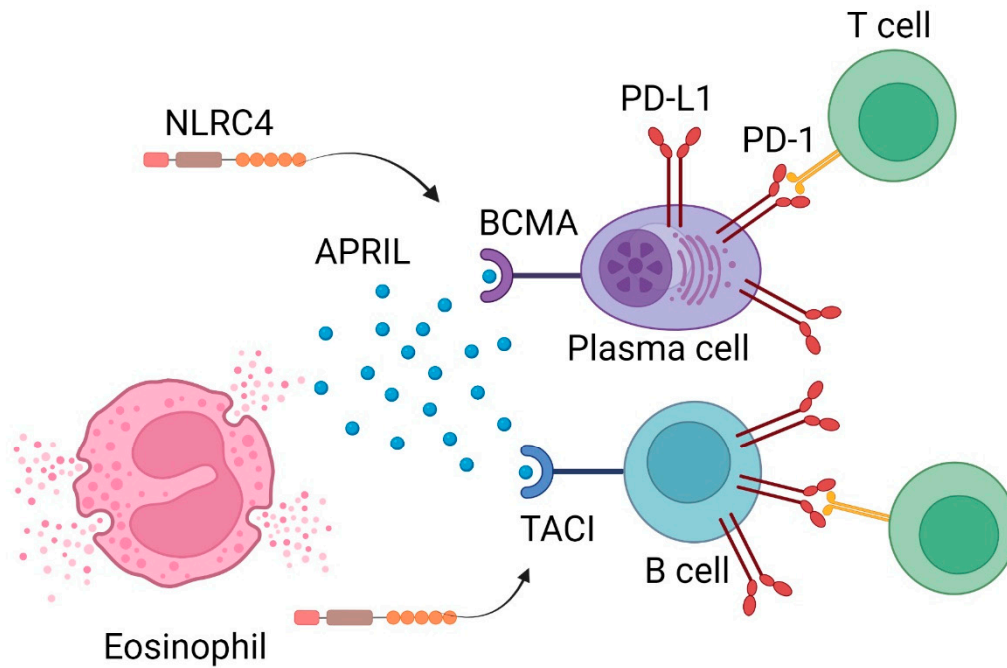

APRIL: a proliferation inducing ligand  
 BCMA: B-cell maturation antigen  
 NLRC4: NLR family CARD domain containing 4  
 TACI: transmembrane activator and CAML interactor

**Supplemental Figure S1.** The biological role of eosinophils in upregulating the expression of programmed death-ligand 1 (PD-L1).
